# Supplementary material for: Barcoding Hymenoptera: 11 Malaise Traps in Three Thai Forests: The First 68 Trap Weeks and 15,338 Parasitoid Wasp Sequences
Source: MDPI journal article supplement (doi:10.3390/f14101991), 2023-10-03
Supplement: s1 [file s1]

## Supplementary Materials

**Table S1.** Frequencies of individuals belonging to each hymenopteran family in samples from each trap locality.

| Superfamily         | Family            | Khao Yai N.P. |     |     |     | Sakaerat |     |     | Doi Phu Kha N.P. |     |     |    | Total |
|---------------------|-------------------|---------------|-----|-----|-----|----------|-----|-----|------------------|-----|-----|----|-------|
|                     |                   | 1             | 2   | 3   | 4   | 1        | 2   | 3   | 1                | 2   | 3   | 4  |       |
| Ceraphronoidea      | Ceraphronidae     | 67            | 29  | 49  | 66  | 14       | 24  | 21  | 7                | 13  | 26  | 0  | 316   |
|                     | Megaspilidae      | 0             | 1   | 5   | 10  | 0        | 1   | 1   | 3                | 5   | 17  | 3  | 46    |
| Chalcidoidea        | Agaonidae         | 1             | 0   | 0   | 0   | 0        | 0   | 0   | 2                | 1   | 0   | 0  | 4     |
|                     | Aphelinidae       | 73            | 3   | 59  | 26  | 52       | 43  | 70  | 7                | 31  | 32  | 10 | 406   |
|                     | Azotidae          | 5             | 0   | 5   | 1   | 4        | 1   | 6   | 0                | 0   | 1   | 0  | 23    |
|                     | Chalcididae       | 6             | 0   | 1   | 2   | 7        | 3   | 3   | 0                | 0   | 3   | 0  | 25    |
|                     | Cleonymidae       | 0             | 0   | 0   | 1   | 1        | 0   | 0   | 0                | 1   | 1   | 0  | 4     |
|                     | Diparidae         | 0             | 1   | 2   | 4   | 0        | 4   | 0   | 0                | 0   | 0   | 0  | 11    |
|                     | Encyrtidae        | 31            | 2   | 24  | 30  | 45       | 42  | 24  | 5                | 13  | 15  | 1  | 232   |
|                     | Eucharitidae      | 0             | 0   | 0   | 0   | 0        | 1   | 2   | 1                | 0   | 0   | 0  | 4     |
|                     | Eulophidae        | 110           | 68  | 151 | 168 | 87       | 117 | 151 | 20               | 67  | 93  | 35 | 1067  |
|                     | Eupelmidae        | 4             | 0   | 5   | 7   | 6        | 12  | 19  | 1                | 7   | 9   | 13 | 83    |
|                     | Eurytomidae       | 1             | 0   | 1   | 0   | 5        | 3   | 3   | 0                | 2   | 4   | 2  | 21    |
|                     | Metapelmaticidae  | 0             | 0   | 0   | 0   | 0        | 0   | 0   | 0                | 1   | 0   | 0  | 1     |
|                     | Mymaridae         | 101           | 24  | 85  | 46  | 41       | 79  | 165 | 14               | 81  | 53  | 37 | 726   |
|                     | Ormyridae         | 0             | 0   | 1   | 0   | 0        | 0   | 0   | 0                | 0   | 0   | 0  | 1     |
|                     | Pirenidae         | 2             | 0   | 2   | 0   | 1        | 0   | 0   | 1                | 2   | 2   | 0  | 10    |
|                     | Pteromalidae      | 50            | 68  | 18  | 52  | 15       | 11  | 8   | 3                | 10  | 20  | 1  | 256   |
|                     | Signiphoridae     | 0             | 0   | 0   | 1   | 0        | 0   | 0   | 0                | 0   | 0   | 0  | 1     |
|                     | Spalangidae       | 0             | 0   | 0   | 0   | 0        | 0   | 0   | 0                | 0   | 2   | 0  | 2     |
|                     | Torymidae         | 3             | 0   | 4   | 2   | 23       | 5   | 5   | 1                | 0   | 2   | 0  | 45    |
|                     | Trichogrammatidae | 60            | 3   | 22  | 5   | 25       | 29  | 38  | 5                | 17  | 8   | 7  | 219   |
| Chrysidoidea        | Bethylidae        | 56            | 21  | 64  | 71  | 82       | 31  | 74  | 1                | 27  | 41  | 43 | 511   |
|                     | Chrysididae       | 1             | 0   | 1   | 1   | 14       | 9   | 15  | 0                | 0   | 1   | 1  | 43    |
|                     | Dryinidae         | 9             | 1   | 10  | 8   | 24       | 9   | 11  | 0                | 9   | 3   | 12 | 96    |
|                     | Embolemidae       | 0             | 0   | 0   | 0   | 0        | 0   | 0   | 0                | 1   | 0   | 0  | 1     |
|                     | Sclerogibbidae    | 1             | 0   | 0   | 0   | 0        | 0   | 0   | 0                | 0   | 0   | 0  | 1     |
| Cynipoidea          | Figitidae         | 22            | 3   | 15  | 47  | 7        | 19  | 13  | 7                | 33  | 76  | 22 | 264   |
| Diaprioidea         | Diapriidae        | 112           | 37  | 69  | 292 | 32       | 37  | 43  | 29               | 115 | 97  | 37 | 900   |
|                     | Ismaridae         | 0             | 0   | 0   | 0   | 0        | 0   | 0   | 0                | 1   | 1   | 0  | 2     |
| Evanioidea          | Evaniidae         | 10            | 9   | 4   | 26  | 85       | 40  | 22  | 2                | 6   | 2   | 7  | 213   |
|                     | Gasteruptiidae    | 0             | 0   | 0   | 0   | 0        | 0   | 1   | 0                | 0   | 0   | 1  | 2     |
| Ichneumonoidea      | Braconidae        | 153           | 114 | 112 | 120 | 86       | 109 | 107 | 20               | 140 | 55  | 49 | 1065  |
|                     | Ichneumonidae     | 224           | 171 | 126 | 288 | 84       | 107 | 77  | 43               | 164 | 198 | 70 | 1552  |
| Mymarommatoid<br>ea | Mymarommatidae    | 2             | 0   | 1   | 0   | 0        | 0   | 0   | 0                | 0   | 0   | 0  | 3     |
| Platygaстроidea     | Nixoniidae        | 0             | 0   | 0   | 0   | 0        | 0   | 1   | 0                | 0   | 0   | 0  | 1     |
|                     | Platygastridae    | 120           | 54  | 71  | 282 | 75       | 102 | 133 | 21               | 148 | 90  | 50 | 1146  |

|                 |                  |     |     |     |     |     |     |     |    |     |     |     |      |
|-----------------|------------------|-----|-----|-----|-----|-----|-----|-----|----|-----|-----|-----|------|
|                 | Scelionidae      | 226 | 106 | 487 | 611 | 468 | 446 | 553 | 88 | 312 | 452 | 268 | 4017 |
|                 | Sparasionidae    | 0   | 0   | 0   | 0   | 1   | 5   | 1   | 0  | 0   | 0   | 0   | 7    |
| Pompiloidea     | Mutillidae       | 11  | 0   | 2   | 0   | 0   | 2   | 8   | 0  | 0   | 6   | 0   | 29   |
| Proctotrupoidea | Proctotrupidae   | 1   | 1   | 0   | 1   | 0   | 0   | 0   | 0  | 4   | 3   | 0   | 10   |
| Scoloidea       | Scoliidae        | 0   | 0   | 1   | 0   | 5   | 4   | 16  | 0  | 0   | 1   | 1   | 28   |
| Thynnoidea      | Thynnidae        | 0   | 0   | 3   | 2   | 11  | 8   | 0   | 0  | 0   | 0   | 0   | 24   |
| Tiphioidea      | Tiphiidae        | 1   | 1   | 2   | 4   | 7   | 3   | 0   | 0  | 15  | 10  | 10  | 53   |
| Stephanoidea    | Stephanidae      | 0   | 0   | 0   | 0   | 0   | 2   | 0   | 0  | 0   | 0   | 0   | 2    |
| Vespoidea       | Rhopalosomatidae | 1   | 0   | 0   | 0   | 0   | 4   | 0   | 0  | 0   | 0   | 0   | 5    |
|                 | e                |     |     |     |     |     |     |     |    |     |     |     |      |

**Table S2.** Numbers of unique parasitoid BINs per Malaise trap per family. Individual Malaise traps are designated by the letters; A to K correspond to Khao Yai traps 1-4, Sakaerat traps 1-3 and Doi Phu Kha traps 1-4 respectively.

| Family            | Total | A   | B   | G   | F   | E   | C   | D   | H  | I   | J   | K   |
|-------------------|-------|-----|-----|-----|-----|-----|-----|-----|----|-----|-----|-----|
| Scelionidae       | 952   | 138 | 89  | 348 | 269 | 328 | 306 | 436 | 66 | 223 | 303 | 186 |
| Ichneumonidae     | 631   | 158 | 106 | 65  | 82  | 64  | 104 | 230 | 39 | 132 | 162 | 62  |
| Eulophidae        | 535   | 85  | 42  | 118 | 90  | 66  | 121 | 119 | 20 | 48  | 74  | 33  |
| Braconidae        | 531   | 97  | 95  | 88  | 80  | 72  | 88  | 88  | 15 | 104 | 45  | 43  |
| Platygastridae    | 472   | 96  | 34  | 103 | 87  | 61  | 57  | 186 | 23 | 107 | 72  | 46  |
| Diapriidae        | 300   | 79  | 26  | 33  | 34  | 29  | 60  | 193 | 23 | 91  | 74  | 26  |
| Mymaridae         | 211   | 67  | 19  | 114 | 64  | 36  | 72  | 32  | 12 | 58  | 37  | 32  |
| Bethylidae        | 205   | 42  | 13  | 56  | 26  | 69  | 50  | 62  | 1  | 24  | 33  | 31  |
| Aphelinidae       | 186   | 48  | 2   | 55  | 39  | 43  | 45  | 25  | 7  | 24  | 26  | 10  |
| Ceraphronidae     | 152   | 49  | 14  | 14  | 30  | 15  | 43  | 52  | 7  | 11  | 21  | 0   |
| Encyrtidae        | 130   | 26  | 1   | 22  | 37  | 39  | 16  | 14  | 5  | 12  | 13  | 1   |
| Figitidae         | 121   | 18  | 3   | 13  | 14  | 5   | 15  | 22  | 7  | 31  | 61  | 22  |
| Pteromalidae      | 88    | 30  | 52  | 8   | 11  | 15  | 14  | 49  | 3  | 6   | 22  | 1   |
| Trichogrammatidae | 76    | 46  | 2   | 34  | 24  | 25  | 7   | 4   | 5  | 16  | 8   | 7   |
| Evanidae          | 55    | 9   | 9   | 21  | 37  | 55  | 3   | 25  | 2  | 6   | 2   | 7   |
| Dryinidae         | 51    | 8   | 1   | 5   | 9   | 20  | 8   | 6   | 0  | 3   | 3   | 11  |
| Tiphiidae         | 34    | 1   | 1   | 0   | 3   | 6   | 2   | 4   | 0  | 15  | 9   | 7   |
| Eupelmidae        | 32    | 3   | 0   | 17  | 12  | 5   | 5   | 6   | 1  | 6   | 3   | 5   |
| Chrysididae       | 24    | 1   | 0   | 14  | 8   | 12  | 1   | 1   | 0  | 0   | 1   | 1   |
| Chalcididae       | 21    | 6   | 0   | 3   | 3   | 6   | 1   | 2   | 0  | 0   | 4   | 0   |
| Torymidae         | 20    | 2   | 0   | 4   | 5   | 22  | 4   | 2   | 1  | 0   | 2   | 0   |
| Megaspilidae      | 19    | 0   | 1   | 1   | 1   | 0   | 5   | 7   | 3  | 6   | 14  | 3   |
| Azotidae          | 17    | 4   | 0   | 6   | 1   | 4   | 5   | 1   | 0  | 0   | 1   | 0   |
| Eurytomidae       | 13    | 1   | 0   | 3   | 3   | 5   | 1   | 0   | 0  | 2   | 4   | 2   |
| Scoliidae         | 9     | 10  | 0   | 8   | 2   | 0   | 2   | 0   | 0  | 0   | 6   | 0   |
| Mutillidae        | 9     | 0   | 0   | 13  | 1   | 4   | 1   | 0   | 0  | 0   | 1   | 1   |
| Pirenidae         | 7     | 1   | 0   | 0   | 0   | 1   | 2   | 0   | 1  | 2   | 1   | 0   |
| Proctotrupidae    | 5     | 1   | 1   | 0   | 0   | 0   | 0   | 1   | 0  | 4   | 3   | 0   |
| Thynnidae         | 4     | 0   | 0   | 0   | 7   | 11  | 3   | 2   | 0  | 0   | 0   | 0   |

|                   |   |   |   |   |   |   |   |   |   |   |   |   |
|-------------------|---|---|---|---|---|---|---|---|---|---|---|---|
| Agaonidae         | 4 | 1 | 0 | 0 | 0 | 0 | 0 | 0 | 2 | 1 | 1 | 0 |
| Diparidae         | 4 | 0 | 1 | 0 | 4 | 0 | 2 | 4 | 0 | 0 | 0 | 0 |
| Eucharitidae      | 4 | 0 | 0 | 2 | 1 | 0 | 0 | 0 | 1 | 0 | 0 | 0 |
| Mymarommatidae    | 3 | 1 | 0 | 0 | 0 | 0 | 1 | 0 | 0 | 0 | 0 | 0 |
| Rhopalosommatidae | 2 | 1 | 0 | 0 | 4 | 0 | 0 | 0 | 0 | 0 | 0 | 0 |
| Cleonymidae       | 2 | 0 | 0 | 0 | 0 | 1 | 0 | 1 | 0 | 0 | 0 | 0 |
| Gasteruptiidae    | 2 | 0 | 0 | 1 | 0 | 0 | 0 | 0 | 0 | 0 | 0 | 1 |
| Ismaridae         | 2 | 0 | 0 | 0 | 0 | 0 | 0 | 0 | 0 | 1 | 1 | 0 |
| Sclerogibbidae    | 1 | 1 | 0 | 0 | 0 | 0 | 0 | 0 | 0 | 0 | 0 | 0 |
| Ormyridae         | 1 | 0 | 0 | 0 | 0 | 0 | 1 | 0 | 0 | 0 | 0 | 0 |
| Signiphoridae     | 1 | 0 | 0 | 0 | 0 | 0 | 0 | 1 | 0 | 0 | 0 | 0 |
| Sparasionidae     | 1 | 0 | 0 | 1 | 5 | 1 | 0 | 0 | 0 | 0 | 0 | 0 |
| ?Torymidae        | 1 | 0 | 0 | 0 | 1 | 0 | 0 | 0 | 0 | 0 | 0 | 0 |
| Nixoniidae        | 1 | 0 | 0 | 1 | 0 | 0 | 0 | 0 | 0 | 0 | 0 | 0 |
| Metapelmatidae    | 1 | 0 | 0 | 0 | 0 | 0 | 0 | 0 | 0 | 1 | 0 | 0 |
| Embolemyidae      | 1 | 0 | 0 | 0 | 0 | 0 | 0 | 0 | 0 | 1 | 0 | 0 |
| Spalangidae       | 1 | 0 | 0 | 0 | 0 | 0 | 0 | 0 | 0 | 0 | 1 | 0 |

**Table S3.** Species level identifications based on BIN membership.

| Species                           | Family        |
|-----------------------------------|---------------|
| <i>Aleiodes chenduplus</i>        | Braconidae    |
| <i>Aleiodes coronopus</i>         | Braconidae    |
| <i>Aleiodes pronopus</i>          | Braconidae    |
| <i>Aleiodes rincewindi</i>        | Braconidae    |
| <i>Aleiodes risaee</i>            | Braconidae    |
| <i>Anagrus flaviapex</i>          | Mymaridae     |
| <i>Anteon brachycerum</i>         | Dryinidae     |
| <i>Aphanogmus fijiensis</i>       | Ceraphronidae |
| <i>Aphelinus gossypii</i>         | Aphelinidae   |
| <i>Aphelinus varipes</i>          | Aphelinidae   |
| <i>Apleurotropis viswanathani</i> | Eulophidae    |
| <i>Ateleute densistriata</i>      | Ichneumonidae |
| <i>Augerella orientalis</i>       | Ichneumonidae |
| <i>Binodoxys acalephae</i>        | Braconidae    |
| <i>Casinaria pyreneator</i>       | Ichneumonidae |
| <i>Coccophagus bogoriensis</i>    | Aphelinidae   |
| <i>Coleopioides postpectalis</i>  | Braconidae    |
| <i>Colpotrochia pilosa</i>        | Ichneumonidae |
| <i>Copidosoma floridanum</i>      | Encyrtidae    |
| <i>Diolcogaster connexa</i>       | Braconidae    |
| <i>Dryinus stantoni</i>           | Dryinidae     |
| <i>Encarsia azimi</i>             | Aphelinidae   |
| <i>Encarsia inaron</i>            | Aphelinidae   |

|                                  |                |
|----------------------------------|----------------|
| <i>Encarsia lounsburyi</i>       | Aphelinidae    |
| <i>Enicospilus dolosus</i>       | Ichneumonidae  |
| <i>Enicospilus nigropectus</i>   | Ichneumonidae  |
| <i>Epitheronia tomerus</i>       | Ichneumonidae  |
| <i>Heptascelio hamatus</i>       | Scelionidae    |
| <i>Hyposoter leucomerus</i>      | Ichneumonidae  |
| <i>Ischnus curvimaculatus</i>    | Ichneumonidae  |
| <i>Isotima rufithorax</i>        | Ichneumonidae  |
| <i>Kotenkosius tricarinatus</i>  | Braconidae     |
| <i>Lipolexis oregmae</i>         | Braconidae     |
| <i>Macroteleia indica</i>        | Scelionidae    |
| <i>Megastylus pectoralis</i>     | Ichneumonidae  |
| <i>Mimipodoryctes rubriceps</i>  | Braconidae     |
| <i>Monontos niphonicus</i>       | Ichneumonidae  |
| <i>Olesicampe melanogaster</i>   | Ichneumonidae  |
| <i>Otitesella minima-VIR</i>     | Pteromalidae   |
| <i>Oxyscelio arcus</i>           | Scelionidae    |
| <i>Oxyscelio intermediatus</i>   | Scelionidae    |
| <i>Oxyscelio kiefferi</i>        | Scelionidae    |
| <i>Oxyscelio nubbin</i>          | Scelionidae    |
| <i>Oxyscelio ogive</i>           | Scelionidae    |
| <i>Paratelenomus saccharalis</i> | Scelionidae    |
| <i>Platygaster demades</i>       | Platygastridae |
| <i>Plectiscus callidulus</i>     | Ichneumonidae  |
| <i>Reclinervellus nielseni</i>   | Ichneumonidae  |
| <i>Skeatia rugosa</i>            | Ichneumonidae  |
| <i>Stenarella insidiator</i>     | Ichneumonidae  |
| <i>Tebennotoma aciculatus</i>    | Braconidae     |
| <i>Telenomus turesis</i>         | Scelionidae    |
| <i>Trathala flavoorbitalis</i>   | Ichneumonidae  |
| <i>Xanthopimpla elegans</i>      | Ichneumonidae  |
| <i>Xanthopimpla yoshimurai</i>   | Ichneumonidae  |

**Table S4.** Number of individual Ichneumonidae Braconidae specimens per trap. The larger value for each trap is in bold font.

| Trap          | Ichneumonidae | Braconidae |
|---------------|---------------|------------|
| KhaoYai 1     | <b>224</b>    | 153        |
| KhaoYai 2     | <b>171</b>    | 114        |
| KhaoYai 3     | <b>126</b>    | 111        |
| KhaoYai 4     | <b>288</b>    | 120        |
| Sakaerat 1    | 84            | <b>86</b>  |
| Sakaerat 2    | 107           | <b>109</b> |
| Sakaerat 3    | 77            | <b>107</b> |
| Doi Phu Kha 1 | <b>43</b>     | 20         |

|               |            |     |
|---------------|------------|-----|
| Doi Phu Kha 1 | <b>164</b> | 140 |
| Doi Phu Kha 1 | <b>198</b> | 55  |
| Doi Phu Kha 1 | <b>70</b>  | 49  |

**Table S5.** Number of Ichneumonidae Braconidae BINs per trap. The larger value for each trap is in bold font.

| <b>Trap</b>   | <b>Ichneumonidae</b> | <b>Braconidae</b> |
|---------------|----------------------|-------------------|
| KhaoYai 1     | <b>125</b>           | 111               |
| KhaoYai 2     | <b>86</b>            | 68                |
| KhaoYai 3     | 74                   | <b>77</b>         |
| KhaoYai 4     | <b>147</b>           | 80                |
| Sakaerat 1    | <b>48</b>            | 47                |
| Sakaerat 2    | <b>65</b>            | 61                |
| Sakaerat 3    | 53                   | <b>71</b>         |
| Doi Phu Kha 1 | <b>34</b>            | 19                |
| Doi Phu Kha 1 | <b>114</b>           | 102               |
| Doi Phu Kha 1 | <b>115</b>           | 46                |
| Doi Phu Kha 1 | <b>62</b>            | 43                |

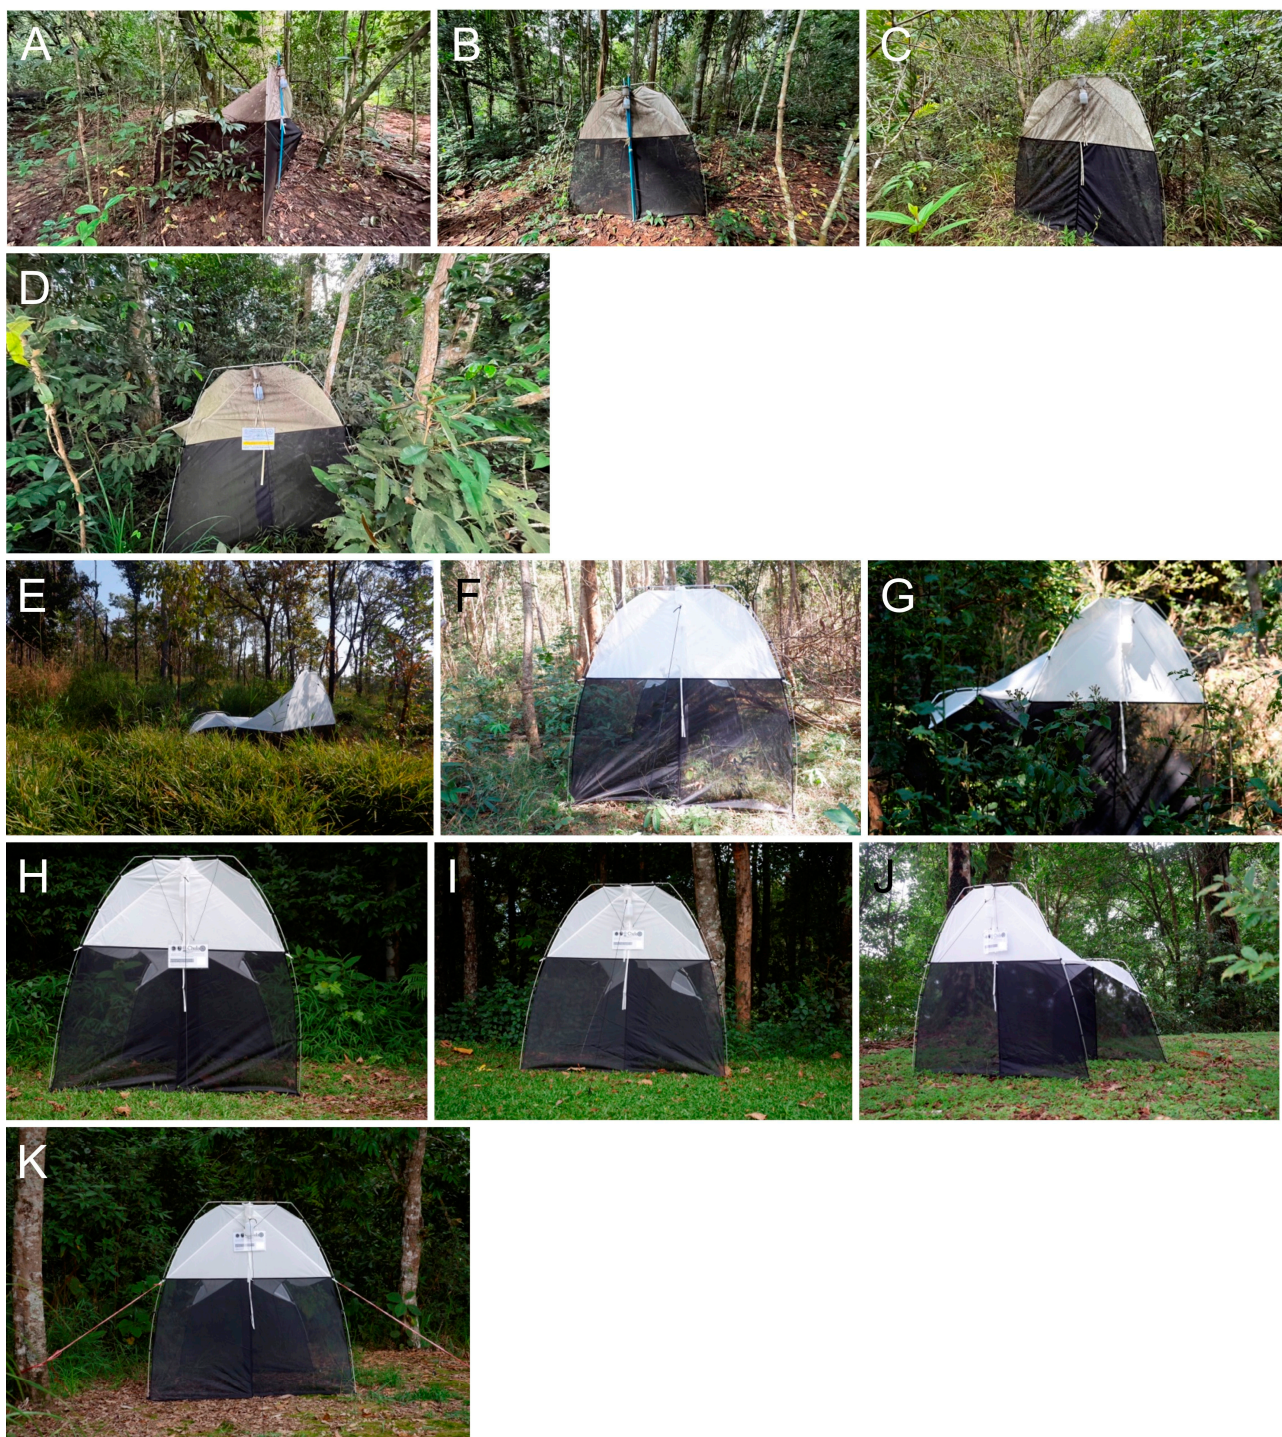

**Figure S1.** Photographs of the 11 Malaise traps *in situ*. (A-D) Traps 1-4 in Khao Yai National Park, respectively; (E-G) Traps 1-3 at Sakaerat Environmental Research Station, respectively; (H-K) Traps 1-4 in Doi Phu Kha National Park, respectively.
